# Supplementary material for: CXCR4 over-expression and survival in cancer: A system review and meta-analysis
Source: PubMed Central journal article supplement (PMC4467131; doi:10.18632/oncotarget.3217), 2014-12-31
Supplement: oncotarget-06-5022-s001.pdf [file oncotarget-06-5022-s001.pdf]

# CXCR4 over-expression and survival in cancer: A system review and meta-analysis

## Supplementary Material

### Suppl.table.1: General characteristics of all studies included in the current meta-analysis.

IHC, immunohistochemistry; WB, western blot; RCR, polymerase chain reaction; FACS, fluorescence-activated cell sorting; ND, no data.

| First author, year | Country     | Disease                                     | Detection method | No. of subjects (CXCR4+/CXCR4-) | Median age(range) | Median follow-up(months) | Period    | Cutoff value detection                                                                                       |
|--------------------|-------------|---------------------------------------------|------------------|---------------------------------|-------------------|--------------------------|-----------|--------------------------------------------------------------------------------------------------------------|
| Chen,2014          | Germany     | Renal cell carcinoma                        | PCR              | 51(32/19)                       | ND                | 54                       | 1992-2011 | The martingale residual method                                                                               |
| Minamiya,2010      | Japan       | Lung cancer                                 | PCR              | 79(37/42)                       | 62.3              | ND                       | 1998-2003 | The threshold score for CXCR4 was 2.4 [(CXCR4 mRNA)/(GAPDH mRNA)]                                            |
| Mirisola,2009      | Germany     | Breast cancer                               | IHC              | 100(47/53)                      | 61                | ND                       | 2000-2002 | Staining intensity score and percentage of positive cells, the threshold score was the median value          |
| Lee,2009,1         | Korea       | Oral squamous cell carcinoma                | IHC              | 74(45/29)                       | 59.2(27-93)       | ND                       | 1995-2002 | Staining intensity score. Positive: 1-3 staining point                                                       |
| Clatot,2011        | France      | Head and neck squamous cell carcinoma       | PCR              | 71(35/36)                       | 58(42-82)         | ND                       | 2004-2008 | The threshold score for CXCR4 was 0.87 [(CXCR4 mRNA)/(PBGD mRNA)]                                            |
| Albert,2012        | France      | Squamous cell carcinoma of tongue           | IHC              | 47(23/24)                       | 61(34-92)         | 48                       | 2005-2008 | The threshold immunohistochemical scores for CXCR4 was 120 based on the staining intensity                   |
| Konoplev,2013      | US          | Acute myeloid leukemia                      | IHC              | 101(66/35)                      | 61(18-88)         | 8                        | 2003-2008 | Percentage of positive tumor cells. The threshold score for CXCR4 was 10%                                    |
| Gockel,2006        | Germany     | Esophageal squamous cell and adenocarcinoma | IHC              | 102(64/38)                      | ND                | ND                       | 1999-2003 | Staining intensity score,cutoff value was 1.5                                                                |
| Wang,2012          | China       | Renal cell carcinoma                        | IHC              | 97(60/37)                       | ND                | ND                       | 2002-2003 | Percentage of positive tumor cells. The threshold score for CXCR4 was 30%                                    |
| Zhang,2013,1       | China       | Esophageal squamous cell carcinoma          | IHC              | 136(47/89)                      | 62(35-90)         | ND                       | 2000-2002 | Staining intensity score and percentage of positive cells, the threshold score was the median value          |
| Speetjens,2009     | Netherlands | Colorectal cancer                           | PCR,IHC          | 70(35/35)                       | ND                | 99                       | 1990-2001 | the threshold score was the median value                                                                     |
| Konoplev,2007      | US          | Acute myeloid leukemia                      | IHC              | 122(70/52)                      | 62(22-82)         | 18                       | 1997-2003 | Percentage of positive tumor cells. The threshold score for CXCR4 was 10%                                    |
| Parker,2012        | US          | Node-positive breast cancer                 | WB               | 185(37/148)                     | 59(41-85)         | 54                       | 1987-2009 | CXCR4 expression was defined as high (>7.5-fold) or low (<7.5-fold)                                          |
| Oda,2009           | Japan       | Soft-tissue sarcoma                         | PCR              | 112(58/54)                      | ND                | 41.5                     | 1988-2004 | mRNA expression index = CXCR4 mRNA value/GAPDH mRNA value *1,000 AU,the threshold score was the median value |
| Andre,2006         | France      | Axillary node positive breast cancer        | IHC              | 133(42/91)                      | 50(32-63)         | 156                      | 1972-1979 | Staining intensity score,cutoff value was 3                                                                  |
| Yopp,2012          | US          | Colorectal liver metastases                 | IHC              | 75(47/28)                       | ND                | 68                       | 2002-2004 | Percentage of positive tumor cells. The threshold score for CXCR4 was 10%                                    |
| Katayama,2005      | Japan       | Head and neck squamous cell carcinoma       | IHC              | 56(16/40)                       | ND                | ND                       | 1983-2003 | Staining intensity score,score 1 to 3, CXCR4 positive; score 0, CXCR4 negative                               |
| Scala,2005         | Italy       | Malignant melanoma                          | IHC              | 71(31/40)                       | 53                | ND                       | 1996-2003 | Percentage of positive tumor cells. The threshold score for CXCR4 was 10%                                    |
| Ottaiano,2006      | Italy       | Stage II-III colorectal cancer              | IHC              | 72(56/16)                       | 55(34-82)         | 23                       | 2003-2004 | Percentage of positive tumor cells. The threshold score for CXCR4 was 50%                                    |
| Otsuka,2011        | Canada      | Stage IV non-small cell lung cancer         | IHC              | 84(10/74)                       | 69(32-96)         | ND                       | 2003-2006 | Cutpoint from CXCR4 expression levels was calculated using log-rank test statistic method                    |

| First author, year | Country | Disease                                               | Detection method | No.of subjects (CXCR4+/CXCR4-) | Median age(range) | Median follow-up(months) | Period    | Cutoff value detection                                                                                                                                                             |
|--------------------|---------|-------------------------------------------------------|------------------|--------------------------------|-------------------|--------------------------|-----------|------------------------------------------------------------------------------------------------------------------------------------------------------------------------------------|
| Wang,2011          | China   | Non-small cell lung cancer                            | IHC              | 208(117/91)                    | 60(35-76)         | 67                       | 2002-2004 | Staining intensity score and percentage of positive cells, the threshold score was 2                                                                                               |
| Scala,2007         | Italy   | Uveal melanoma                                        | IHC              | 25(7/18)                       | 62(25-84)         | 68                       | 1984-2003 | Percentage of positive tumor cells. The threshold score for CXCR4 was 50%                                                                                                          |
| Oda,2007           | Japan   | Ovarian cancer                                        | IHC              | 52(20/32)                      | 58(36-77)         | 26.1                     | 1998-2004 | Staining intensity score,cutoff value was 2                                                                                                                                        |
| He,2013            | China   | Gastric cancer                                        | IHC              | 97(43/54)                      | ND                | ND                       | 2000-2005 | Staining intensity score                                                                                                                                                           |
| Zobair,2013        | China   | Non-small cell lung cancer                            | IHC              | 125(62/63)                     | 59(37-80)         | ND                       | 2003-2011 | Percentage of positive tumor cells. The threshold score for CXCR4 was 10%                                                                                                          |
| Popple,2012        | UK      | Ovarian cancer                                        | IHC              | 241(214/27)                    | 61(24-90)         | 167                      | 1984-1997 | Tumors were classified by H scores and assessed for high, moderate, low and negative CXCR4 expression                                                                              |
| Pils,2007          | Austria | Ovarian cancer                                        | IHC              | 119(64/55)                     | 58.6(27.6-87.2)   | 43.7                     | ND        | Staining intensity score,cutoff value was 2                                                                                                                                        |
| Jiang,2006         | China   | Epithelial ovarian cancer                             | IHC              | 44(26/18)                      | 51(43-60)         | 37                       | 1999-2003 | Staining intensity score and percentage of positive cells, the threshold score was 1                                                                                               |
| Kaifi,2005         | Germany | Esophageal Cancer                                     | IHC              | 136(75/61)                     | 59.5              | 28                       | 1992-2003 | Percentage of positive tumor cells. The threshold score for CXCR4 was 20%                                                                                                          |
| Sasaki,2009        | Japan   | Esophageal Cancer                                     | IHC              | 207(174/33)                    | 64(36-92)         | 42                       | 1987-1998 | Staining intensity score,cutoff value was 1                                                                                                                                        |
| Lu,2011            | China   | Esophageal Cancer                                     | IHC              | 127(92/35)                     | 59(39-77)         | 54                       | 2005-2009 | Staining intensity score and percentage of positive cells, the threshold score was 2                                                                                               |
| Lu,2014            | China   | Esophageal Cancer                                     | IHC              | 154(101/53)                    | 62(35-85)         | ND                       | 2006-2010 | Staining intensity score and percentage of positive cells, the threshold score was 2                                                                                               |
| Andre,2009         | France  | Breast cancer                                         | IHC              | 794(92/702)                    | ND                | 120                      | 1989-1995 | Staining intensity score and percentage of positive cells, the threshold score was 1                                                                                               |
| Liu,2010           | China   | Breast cancer                                         | IHC              | 200(110/90)                    | 51(37-74)         | 88                       | 1997-2004 | Staining intensity score and percentage of positive cells, the threshold score was 6                                                                                               |
| Chu,2010           | US      | Triple negative breast cancer                         | WB               | 151(30/121)                    | 50                | 37                       | 1988-2006 | CXCR4 expression was defined as high (>6 fold) or low (<6 fold)                                                                                                                    |
| Holm,2009          | US      | Locally advanced breast cancer                        | WB               | 54(19/35)                      | 50                | 30                       | ND        | CXCR4 expression was defined as high (>6.6 fold) or low (<6.6 fold)                                                                                                                |
| Blot,2008          | France  | Node-negative breast cancer                           | IHC              | 194(155/39)                    | 55(29-84)         | ND                       | 1991-2001 | Percentage of positive tumor cells. The threshold score for CXCR4 was 10%                                                                                                          |
| Salvucci,2006      | Germany | Breast cancer                                         | IHC              | 1382(969/413)                  | 62(26-101)        | 68                       | 1985-2001 | Staining intensity score and percentage of positive cells                                                                                                                          |
| Hiller,2011        | US      | Locally advanced breast cancer                        | WB               | 77(22/55)                      | 51                | 42                       | 1996-2009 | CXCR4 expression was defined as high (>6.6 fold) or low (<6.6 fold)                                                                                                                |
| Chu,2011           | US      | Hormone receptor-positive,node-negative breast cancer | WB               | 101(22/79)                     | 54                | 59                       | 1998-2007 | CXCR4 expression was defined as high (>6.6 fold) or low (<6.6 fold)                                                                                                                |
| Holm,2007          | US      | HER 2 negative breast cancer                          | WB               | 103(41/62)                     | 53                | 26                       | ND        | CXCR4 expression was defined as high (>6.6 fold) or low (<6.6 fold)                                                                                                                |
| Hassan,2009        | Canada  | Breast cancer                                         | IHC              | 236(139/97)                    | 50                | 39.6                     | 2000-2003 | Staining intensity score and percentage of positive cells,the patients were divided into low, medium, and high expression categories using outcome-derived cut points from X-tile. |
| Mizell,2009        | US      | HER-2 negative breast cancer                          | WB               | 115(13/102)                    | 51                | 53                       | 1998-2006 | CXCR4 expression was defined as high (>6.6 fold) or low (<6.6 fold)                                                                                                                |
| Kwak,2005          | Korea   | Gastric cancer                                        | IHC              | 307(112/195)                   | ND                | ND                       | 1995-2003 | Staining intensity score,cutoff value was 2                                                                                                                                        |
| Reckamp,2009       | US      | Advanced non-small cell lung cancer                   | FACS             | 16(5/11)                       | 73(42-83)         | 15                       | 2004-2006 | 2500 cells/ml                                                                                                                                                                      |
| Spoos,2007         | US      | Acute myelogenous leukemia                            | FACS             | 90(58/32)                      | 62.5(18-93)       | 13                       | 2001-2004 | cutoff value for mean fluorescence intensity ratios was 5                                                                                                                          |
| Li,2014            | China   | Epithelial ovarian cancer                             | IHC              | 124(75/49)                     | ND                | ND                       | 2004-2007 | Staining intensity score and percentage of positive cells, the threshold score was 5                                                                                               |

| First author, year | Country     | Disease                           | Detection method | No.of subjects (CXCR4+/CXCR4-) | Median age(range) | Median follow-up(months) | Period    | Cutoff value detection                                                                                                                                                                                    |
|--------------------|-------------|-----------------------------------|------------------|--------------------------------|-------------------|--------------------------|-----------|-----------------------------------------------------------------------------------------------------------------------------------------------------------------------------------------------------------|
| An,2014            | China       | Clear cell renal cell carcinoma   | IHC              | 225(110/115)                   | ND                | 62                       | 1999-2006 | Staining intensity score and percentage of positive cells, the threshold score was 2                                                                                                                      |
| Li,2013            | France      | Clear cell renal cell carcinoma   | IHC              | 104(68/36)                     | 64.5(34-86)       | 79.5                     | 1999-2005 | Percentage of positive tumor cells. The threshold score for CXCR4 was 25%                                                                                                                                 |
| Li,2011            | China       | Advanced renal cell carcinoma     | IHC              | 117(59/58)                     | 59(16-85)         | 51                       | 2001-2005 | Staining intensity score,cutoff value was 2                                                                                                                                                               |
| Zhang,2013,II      | China       | Myelodysplastic syndrome          | FACS             | 81(40/41)                      | 52(12-77)         | ND                       | 2006-2011 | cutoff value for mean fluorescence intensity ratios was 29.34                                                                                                                                             |
| D'Alterio,2010     | Italy       | Renal cancer                      | PCR              | 170(107/63)                    | 68(35-82)         | ND                       | 1999-2007 | Percentage of positive tumor cells. The threshold score for CXCR4 was 20%                                                                                                                                 |
| Ahn,2013           | US          | Acute myeloid leukemia            | IHC              | 53(26/27)                      | 60(32-83)         | 14.5                     | ND        | Percentage of positive tumor cells. The threshold score for CXCR4 was 10%                                                                                                                                 |
| D'Alterio,2014     | Italy       | Rectal cancer                     | IHC              | 68(33/35)                      | ND                | 64                       | ND        | Percentage of positive tumor cells. The threshold score for CXCR4 was 50%                                                                                                                                 |
| Shiozaki,2013      | Japan       | Vulvar cancer                     | IHC              | 30(19/11)                      | 66(23-86)         | ND                       | 1999-2010 | Percentage of positive tumor cells. The threshold score for CXCR4 was 50%                                                                                                                                 |
| Rombouts,2004      | netherlands | Adult acute myeloid leukemia      | FACS             | 90(55/35)                      | 44(16-88)         | ND                       | ND        | Percentage of positive labeled cells. The threshold score for CXCR4 was 36.4%                                                                                                                             |
| Xiang,2009         | China       | Hepatocellular carcinoma          | IHC              | 181(91/90)                     | 51(12-86)         | 20                       | 1999-2007 | Staining intensity score,cutoff value was 2                                                                                                                                                               |
| Kim,2005           | US          | Colorectal Cancer                 | PCR              | 35(18/17)                      | 76(41-97)         | ND                       | ND        | Patients were dichotomized as having high or low CXCR4 expression based on the median of all normalized stage I/II CXCR4 expression values                                                                |
| Yao,2011           | China       | Gallbladder cancer                | IHC              | 72(50/22)                      | 60(32-84)         | 29.6                     | 1995-2005 | Staining intensity score and percentage of positive cells, the threshold score was 2                                                                                                                      |
| Jung,2011          | Korea       | Prostate cancer                   | IHC              | 57(36/21)                      | 64(51-76)         | 39                       | 2001-2008 | Staining intensity score,cutoff value was 2                                                                                                                                                               |
| Spano,2004         | France      | Non-small cell lung cancer        | IHC              | 61(17/44)                      | 60.6(38-84)       | 75.6                     | 1987-1999 | Staining intensity score and percentage of positive cells. Positive staining was defined as score of 6 or 9 (any slide with >50% of the cells expressing staining with intermediate or strong intensity). |
| Marechal,2009      | Belgium     | Pancreatic adenocarcinoma         | IHC              | 71 (39/32)                     | 64.5(39-81)       | ND                       | 1998-2006 | Staining intensity score and percentage of positive cells, the threshold score was 3                                                                                                                      |
| Wagner,2009        | US          | Lung cancer                       | IHC              | 154(47/107)                    | 67                | 26.4                     | ND        | Staining intensity score,cutoff value was 2                                                                                                                                                               |
| Sekiya,2012        | Japan       | Clear cell carcinoma of the ovary | IHC              | 42(21/21)                      | 52(27-69)         | ND                       | 1993-2006 | Staining intensity score and percentage of positive cells, the threshold score was 3                                                                                                                      |
| Bao,2013           | China       | Multiple myeloma                  | FACS             | 227(98/129)                    | 58(32-84)         | ND                       | 2006-2012 | Percentage of positive labeled cells. The threshold score for CXCR4 was 20%                                                                                                                               |
| Liu,2014           | China       | Colorectal Cancer                 | IHC              | 92(56/36)                      | 61(30-86)         | 65                       | 2005-2007 | Staining intensity score,cutoff value was 2                                                                                                                                                               |
| Koishi,2006        | Japan       | Esophageal cancer                 | IHC              | 24(13/11)                      | 60(44-78)         | ND                       | 1996-2003 | Staining intensity score,cutoff value was 2                                                                                                                                                               |
| Gebauer,2011       | Germany     | Pancreatic adenocarcinoma         | IHC              | 249(215/34)                    | 63(32-87)         | ND                       | 1994-2005 | Percentage of positive labeled cells. The threshold score for CXCR4 was 20%                                                                                                                               |
| Akashi,2008        | Japan       | Metastatic prostate cancer        | IHC              | 52(18/34)                      | 73(54-87)         | ND                       | 1986-1999 | Percentage of positive labeled cells. The threshold score for CXCR4 was 50%                                                                                                                               |
| Fanelli,2012       | Brazil      | Gastric cancer                    | IHC              | 104(85/19)                     | 65(20-88)         | ND                       | 1998-2006 | Staining intensity score and percentage of positive cells, the threshold score was 3                                                                                                                      |
| Cabioglu,2007      | US          | Inflammatory breast cancer        | IHC              | 44(18/26)                      | 49(29-73)         | 46.5                     | 1994-2002 | Percentage of positive labeled cells. The threshold score for CXCR4 was 50%                                                                                                                               |
| Chen,2013,I        | China       | Triple-negative breast cancer     | IHC              | 75(53/22)                      | 50(29-83)         | ND                       | 2000-2008 | Staining intensity score,cutoff value was 2                                                                                                                                                               |
| Almofiti,2004      | Japan       | Oral squamous cell carcinoma      | IHC              | 59(35/24)                      | ND                | ND                       | 1985-2000 | Percentage of positive labeled cells. The threshold score for CXCR4 was 25%                                                                                                                               |

| First author, year | Country | Disease                       | Detection method | No.of subjects (CXCR4+/CXCR4-) | Median age(range) | Median follow-up(months) | Period    | Cutoff value detection                                                               |
|--------------------|---------|-------------------------------|------------------|--------------------------------|-------------------|--------------------------|-----------|--------------------------------------------------------------------------------------|
| Almofiti,2004      | Japan   | Oral squamous cell carcinoma  | IHC              | 59(35/24)                      | ND                | ND                       | 1985-2000 | Percentage of positive labeled cells. The threshold score for CXCR4 was 25%          |
| Lee,2009,II        | Korea   | Gastric cancer                | IHC              | 221(108/113)                   | ND                | ND                       | 2000-2003 | Staining intensity score,cutoff value was 2                                          |
| Zhang,2012         | China   | Stage II-III colon cancer     | IHC              | 125(74/51)                     | 61.8              | 78                       | 2001-2005 | Staining intensity score and percentage of positive cells, the threshold score was 4 |
| Yang,2012          | China   | Gastric cancer                | IHC              | 26(13/13)                      | 56(29-85)         | 70.5                     | 2004      | Staining intensity score and percentage of positive cells, the threshold score was 4 |
| Liu,2011           | China   | Osteosarcoma                  | IHC              | 56(39/17)                      | 18(7-67)          | 33.5                     | 2002-2006 | Percentage of positive tumor cells. The threshold score for CXCR4 was 20%            |
| Chen,2013,II       | China   | Bilateral breast cancer       | IHC              | 33(22/11)                      | 48(21-89)         | 44.5                     | 2000-2008 | Staining intensity score and percentage of positive cells, the threshold score was 1 |
| Longo-Imedio,2005  | Spain   | Primary melanoma              | IHC              | 40(14/26)                      | 61(21-89)         | 32                       | ND        | Percentage of positive tumor cells. The threshold score for CXCR4 was 20%            |
| Segawa,2009        | Japan   | Nasopharyngeal carcinoma      | IHC              | 76(41/35)                      | 56(19-85)         | ND                       | 1985-2007 | Staining intensity score and percentage of positive cells, the threshold score was 4 |
| Franco,2010        | Italy   | Melanoma                      | IHC              | 32(22/10)                      | ND                | ND                       | 1998-2006 | Percentage of positive tumor cells. The threshold score for CXCR4 was 30%            |
| Yu,2013            | China   | Triple-negative breast cancer | IHC              | 148(102/46)                    | ND                | ND                       | 1995-2011 | Staining intensity score and percentage of positive cells, the threshold score was 4 |
| Saigusa,2010       | Japan   | Rectal cancer                 | PCR              | 53(16/37)                      | 62(37-78)         | 48                       | 2001-2008 | positive:detectable                                                                  |
| Kodama,2007        | Japan   | Cervical cancer               | IHC              | 174(110/64)                    | 46(25-67)         | 56.5                     | 2001-2006 | Percentage of positive labeled cells. The threshold score for CXCR4 was 50%          |
| Wang,2005          | China   | Nasopharyngeal carcinoma      | IHC              | 194(88/106)                    | 45(25-70)         | ND                       | 2000-2004 | Staining intensity score,cutoff value was 4                                          |

**Suppl. fig. 2:** Methodological quality of all studies based on the Newcastle-Ottawa scale for assessing the quality of cohort trials

| First author, year | Representativeness of exposed cohort | Selection of non-exposed cohort | Ascertainment of exposure | Outcome not present at start of study | Comparability based on the design or analysis | Ascertainment of outcome | Follow-up long enough for outcomes | Adequacy of follow-up | Total score |
|--------------------|--------------------------------------|---------------------------------|---------------------------|---------------------------------------|-----------------------------------------------|--------------------------|------------------------------------|-----------------------|-------------|
| Chen,2014          | 1                                    | 1                               | 1                         | 1                                     | 1                                             | 1                        | 1                                  | 1                     | 8           |
| Minamiya,2010      | 1                                    | 1                               | 1                         | 0                                     | 2                                             | 1                        | 1                                  | 0                     | 7           |
| Mirisola,2009      | 1                                    | 1                               | 1                         | 0                                     | 0                                             | 1                        | 1                                  | 0                     | 5           |
| Lee,2009,I         | 1                                    | 1                               | 1                         | 1                                     | 1                                             | 1                        | 1                                  | 1                     | 8           |
| Clatot,2011        | 1                                    | 1                               | 1                         | 1                                     | 0                                             | 1                        | 1                                  | 0                     | 6           |
| Albert,2012        | 1                                    | 1                               | 1                         | 1                                     | 0                                             | 1                        | 1                                  | 1                     | 7           |
| Konoplev,2013      | 1                                    | 1                               | 1                         | 1                                     | 2                                             | 1                        | 1                                  | 1                     | 9           |
| Gockel,2006        | 1                                    | 1                               | 1                         | 0                                     | 0                                             | 1                        | 1                                  | 1                     | 6           |
| Wang,2012          | 1                                    | 1                               | 1                         | 1                                     | 2                                             | 1                        | 1                                  | 0                     | 8           |
| Zhang,2013,I       | 1                                    | 1                               | 1                         | 1                                     | 2                                             | 1                        | 1                                  | 0                     | 8           |
| Speetjens,2009     | 1                                    | 1                               | 1                         | 1                                     | 2                                             | 1                        | 1                                  | 1                     | 9           |
| Konoplev,2007      | 1                                    | 1                               | 1                         | 1                                     | 2                                             | 1                        | 1                                  | 1                     | 9           |
| Parker,2012        | 1                                    | 1                               | 1                         | 1                                     | 2                                             | 1                        | 1                                  | 0                     | 8           |
| Oda,2009           | 1                                    | 1                               | 1                         | 1                                     | 2                                             | 1                        | 1                                  | 0                     | 8           |
| Andre,2006         | 1                                    | 1                               | 1                         | 0                                     | 1                                             | 1                        | 1                                  | 0                     | 6           |
| Yopp,2012          | 1                                    | 1                               | 1                         | 1                                     | 2                                             | 1                        | 1                                  | 1                     | 9           |
| Katayama,2005      | 1                                    | 1                               | 1                         | 1                                     | 2                                             | 1                        | 1                                  | 0                     | 8           |
| Scala,2005         | 1                                    | 1                               | 1                         | 1                                     | 2                                             | 1                        | 1                                  | 0                     | 8           |
| Ottaiano,2006      | 1                                    | 1                               | 1                         | 1                                     | 2                                             | 1                        | 0                                  | 0                     | 7           |
| Otsuka,2011        | 1                                    | 1                               | 1                         | 1                                     | 0                                             | 1                        | 1                                  | 0                     | 6           |
| Wang,2011          | 1                                    | 1                               | 1                         | 1                                     | 2                                             | 1                        | 1                                  | 0                     | 8           |
| Scala,2007         | 1                                    | 1                               | 1                         | 1                                     | 0                                             | 1                        | 1                                  | 0                     | 6           |
| Oda,2007           | 1                                    | 1                               | 1                         | 1                                     | 2                                             | 1                        | 1                                  | 0                     | 8           |
| He,2013            | 1                                    | 1                               | 0                         | 1                                     | 2                                             | 1                        | 1                                  | 1                     | 8           |
| Zobair,2013        | 1                                    | 1                               | 1                         | 1                                     | 2                                             | 1                        | 1                                  | 0                     | 8           |
| Popple,2012        | 1                                    | 1                               | 1                         | 1                                     | 1                                             | 1                        | 1                                  | 1                     | 8           |
| Pils,2007          | 1                                    | 1                               | 1                         | 1                                     | 1                                             | 0                        | 1                                  | 0                     | 6           |
| Jiang,2006         | 1                                    | 1                               | 1                         | 1                                     | 0                                             | 1                        | 1                                  | 0                     | 6           |
| Kaifi,2005         | 1                                    | 1                               | 1                         | 1                                     | 1                                             | 1                        | 1                                  | 0                     | 7           |
| Sasaki,2009        | 1                                    | 1                               | 1                         | 0                                     | 0                                             | 1                        | 1                                  | 0                     | 5           |
| Lu,2011            | 1                                    | 1                               | 1                         | 1                                     | 0                                             | 1                        | 1                                  | 0                     | 6           |
| Lu,2014            | 1                                    | 1                               | 1                         | 1                                     | 0                                             | 1                        | 1                                  | 1                     | 7           |
| Andre,2009         | 1                                    | 1                               | 1                         | 1                                     | 0                                             | 1                        | 1                                  | 0                     | 6           |
| Liu,2010           | 1                                    | 1                               | 1                         | 1                                     | 0                                             | 1                        | 1                                  | 0                     | 6           |
| Chu,2010           | 1                                    | 1                               | 1                         | 0                                     | 0                                             | 1                        | 1                                  | 0                     | 5           |
| Holm,2009          | 1                                    | 1                               | 1                         | 1                                     | 0                                             | 1                        | 1                                  | 0                     | 6           |
| Blot,2008          | 1                                    | 1                               | 1                         | 1                                     | 0                                             | 1                        | 1                                  | 0                     | 6           |
| Salvucci,2006      | 1                                    | 1                               | 0                         | 1                                     | 2                                             | 1                        | 1                                  | 0                     | 7           |
| Hiller,2011        | 1                                    | 1                               | 1                         | 1                                     | 0                                             | 1                        | 1                                  | 0                     | 6           |

| First author, year | Representativeness of exposed cohort | Selection of non-exposed cohort | Ascertainment of exposure | Outcome not present at start of study | Comparability based on the design or analysis | Ascertainment of outcome | Follow-up long enough for outcomes | Adequacy of follow-up | Total score |
|--------------------|--------------------------------------|---------------------------------|---------------------------|---------------------------------------|-----------------------------------------------|--------------------------|------------------------------------|-----------------------|-------------|
| Chu,2011           | 1                                    | 1                               | 1                         | 1                                     | 0                                             | 1                        | 0                                  | 0                     | 5           |
| Holm,2007          | 1                                    | 1                               | 1                         | 1                                     | 0                                             | 1                        | 0                                  | 0                     | 5           |
| Hassan,2009        | 1                                    | 1                               | 1                         | 1                                     | 0                                             | 1                        | 0                                  | 1                     | 6           |
| Mize,2009          | 1                                    | 1                               | 1                         | 1                                     | 0                                             | 1                        | 1                                  | 0                     | 6           |
| Kwak,2005          | 1                                    | 1                               | 1                         | 0                                     | 0                                             | 1                        | 0                                  | 1                     | 5           |
| Reckamp,2009       | 1                                    | 1                               | 1                         | 1                                     | 0                                             | 1                        | 1                                  | 0                     | 6           |
| Spoa,2007          | 1                                    | 1                               | 1                         | 0                                     | 2                                             | 1                        | 1                                  | 1                     | 8           |
| Li,2014            | 1                                    | 1                               | 1                         | 1                                     | 0                                             | 1                        | 1                                  | 1                     | 7           |
| An,2014            | 1                                    | 1                               | 1                         | 1                                     | 1                                             | 1                        | 1                                  | 1                     | 8           |
| Li,2013            | 1                                    | 1                               | 1                         | 0                                     | 2                                             | 1                        | 1                                  | 1                     | 8           |
| Li,2011            | 1                                    | 1                               | 1                         | 0                                     | 0                                             | 1                        | 1                                  | 0                     | 5           |
| Zhang,2013,II      | 1                                    | 1                               | 1                         | 1                                     | 2                                             | 1                        | 1                                  | 0                     | 8           |
| D'Alterio,2010     | 1                                    | 1                               | 1                         | 1                                     | 2                                             | 1                        | 1                                  | 0                     | 8           |
| Ahn,2013           | 1                                    | 1                               | 1                         | 0                                     | 2                                             | 1                        | 1                                  | 1                     | 8           |
| D'Alterio,2014     | 1                                    | 1                               | 1                         | 1                                     | 2                                             | 1                        | 1                                  | 0                     | 8           |
| Shiozaki,2013      | 1                                    | 1                               | 1                         | 1                                     | 2                                             | 1                        | 1                                  | 0                     | 8           |
| Rombouts,2004      | 1                                    | 1                               | 1                         | 1                                     | 0                                             | 1                        | 1                                  | 1                     | 7           |
| Xiang,2009         | 1                                    | 1                               | 1                         | 1                                     | 0                                             | 1                        | 1                                  | 1                     | 7           |
| Kim,2005           | 1                                    | 1                               | 1                         | 1                                     | 0                                             | 1                        | 1                                  | 1                     | 7           |
| Yao,2011           | 1                                    | 1                               | 1                         | 1                                     | 0                                             | 1                        | 1                                  | 0                     | 6           |
| Jung,2011          | 1                                    | 1                               | 1                         | 1                                     | 0                                             | 1                        | 1                                  | 1                     | 7           |
| Spano,2004         | 1                                    | 1                               | 1                         | 0                                     | 0                                             | 1                        | 1                                  | 0                     | 5           |
| Marechal,2009      | 1                                    | 1                               | 1                         | 1                                     | 0                                             | 1                        | 1                                  | 1                     | 7           |
| Wagner,2009        | 1                                    | 1                               | 1                         | 1                                     | 0                                             | 1                        | 1                                  | 1                     | 7           |
| Sekiya,2012        | 1                                    | 1                               | 1                         | 0                                     | 0                                             | 1                        | 1                                  | 1                     | 6           |
| Bao,2013           | 1                                    | 1                               | 1                         | 1                                     | 0                                             | 1                        | 1                                  | 1                     | 7           |
| Liu,2014           | 1                                    | 1                               | 1                         | 1                                     | 0                                             | 1                        | 1                                  | 1                     | 7           |
| Koishi,2006        | 1                                    | 1                               | 1                         | 1                                     | 0                                             | 1                        | 1                                  | 0                     | 6           |
| Gebauer,2011       | 1                                    | 1                               | 1                         | 1                                     | 0                                             | 1                        | 1                                  | 1                     | 7           |
| Akashi,2008        | 1                                    | 1                               | 1                         | 1                                     | 0                                             | 1                        | 1                                  | 0                     | 6           |
| Faneli,2012        | 1                                    | 1                               | 1                         | 1                                     | 0                                             | 1                        | 1                                  | 1                     | 7           |
| Cabioglu,2007      | 1                                    | 1                               | 1                         | 1                                     | 0                                             | 1                        | 1                                  | 1                     | 7           |
| Chen,2013,I        | 1                                    | 1                               | 1                         | 1                                     | 0                                             | 1                        | 1                                  | 0                     | 6           |
| Almofiti,2004      | 1                                    | 1                               | 1                         | 1                                     | 0                                             | 1                        | 1                                  | 0                     | 6           |
| Lee,2009,II        | 1                                    | 1                               | 1                         | 1                                     | 0                                             | 1                        | 1                                  | 0                     | 6           |
| Zhang,2012         | 1                                    | 1                               | 1                         | 0                                     | 0                                             | 1                        | 1                                  | 0                     | 5           |
| Ying,2012          | 1                                    | 1                               | 1                         | 0                                     | 0                                             | 1                        | 1                                  | 1                     | 6           |
| Lin,2011           | 1                                    | 1                               | 1                         | 1                                     | 0                                             | 1                        | 1                                  | 0                     | 6           |
| Chen,2013,II       | 1                                    | 1                               | 1                         | 1                                     | 0                                             | 1                        | 1                                  | 0                     | 6           |
| First author, year | Representativeness of exposed cohort | Selection of non-exposed cohort | Ascertainment of exposure | Outcome not present at start of study | Comparability based on the design or analysis | Ascertainment of outcome | Follow-up long enough for outcomes | Adequacy of follow-up | Total score |
| Chen,2013,II       | 1                                    | 1                               | 1                         | 1                                     | 0                                             | 1                        | 1                                  | 0                     | 6           |
| Longo-Imedio,2005  | 1                                    | 1                               | 1                         | 1                                     | 0                                             | 1                        | 1                                  | 0                     | 6           |
| Segawa,2009        | 1                                    | 1                               | 1                         | 1                                     | 0                                             | 1                        | 1                                  | 1                     | 7           |
| Franco,2010        | 1                                    | 1                               | 1                         | 1                                     | 0                                             | 1                        | 1                                  | 1                     | 7           |
| Yu,2013            | 1                                    | 1                               | 1                         | 1                                     | 0                                             | 1                        | 1                                  | 1                     | 7           |
| Saigusa,2010       | 1                                    | 1                               | 0                         | 1                                     | 0                                             | 1                        | 1                                  | 0                     | 5           |
| Kodama,2007        | 1                                    | 1                               | 1                         | 1                                     | 0                                             | 1                        | 0                                  | 1                     | 6           |
| Wang,2005          | 1                                    | 1                               | 1                         | 1                                     | 0                                             | 1                        | 1                                  | 0                     | 6           |

**Suppl. table 3** List of adjustment factors employed in all studies included in current meta-analysis.

AJCC, American joint committee on cancer; BMI, body mass index; BRE grade, Elston and Ellis grade; CCR7, C-C chemokine receptor type 7; CEBPA, CCAAT/enhancer-binding protein alpha; CRM, circumferential resection margin; CXCL 12, C-X-C motif chemokine 12; CXCR 7, C-X-C chemokine receptor type 7; ECOG, eastern cooperative oncology group; ER, estrogen receptor; FIGO, the international federation of gynecological oncologists; FLT 3, fms-like tyrosine kinase 3; HER2, human epidermal growth factor receptor 2; ITD, internal tandem duplication; LDH, lactate dehydrogenase; LRP, leucine responsive protein; MMP-9, matrix metalloproteinase 9; NPM1, nucleophosmin 1; PR, progesterone receptor; SLN, sentinel lymph nodes; STAT 3, signal transducer and activator of transcription 3; TRG, tumor regression grade; VEGF, vascular endothelial growth factor; WBC, white blood cells; WHO, world health organization; YB 1, Y box binding protein 1; ND, no data.

| First author, year | country     | Adjustment for Covariates                                                                                       |
|--------------------|-------------|-----------------------------------------------------------------------------------------------------------------|
| Chen,2014          | Germany     | TNM stage,pathological grade,epithelial-mesenchymal transition related genes                                    |
| Minamiya,2010      | Japan       | Age,sex,differentiation grade,tumor size,lumph node metastasis                                                  |
| Mirisola,2009      | Germany     | ND                                                                                                              |
| Lee,2009,I         | Korea       | Tumor size,lymph node metastasis,TNM stage,MMP-9                                                                |
| Clatot,2011        | France      | ND                                                                                                              |
| Albert,2012        | France      | ND                                                                                                              |
| Konoplev,2013      | US          | Age,history of antecedent hematologic disorder,thrombocytopenia,serum creatinine level,serum albumin level,NPM1 |
| Gockel,2006        | Germany     | ND                                                                                                              |
| Wang,2012          | China       | Age,sex,AJCC stage,lymph node status,metastasis,histologic variant, Fuhrman's grade                             |
| Zhang,2013,I       | China       | Age,gender,WHO grade,TNM stage                                                                                  |
| Speetjens,2009     | Netherlands | Age,sex,tumor location,TNM stage,microsatellite status                                                          |
| Konoplev,2007      | US          | Age,sex,race,performance status,incorporation of cytarabine in the therapeutic regimen,antecedent hematological |
| Parker,2012        | US          | Age,ER,PR,HER 2 status,TNM stage,WHO grade                                                                      |
| Oda,2009           | Japan       | Age,sex,site,size,depth,mitosis,necrosis,histologic grade,AJCC stage,MIB-LI,VEGF                                |
| Andre,2006         | France      | Treatment                                                                                                       |
| Yopp,2012          | US          | Age,sex,clinic risk score,margin,distribution,CCR7,CXCL12 expression                                            |
| Katayama,2005      | Japan       | Age,sex,primary site,tumor differentiation,clinical stage                                                       |
| Scala,2005         | Italy       | Age,sex,Breslow, SLN status,presence of ulceration                                                              |
| Ottiano,2006       | Italy       | Age,sex,AJCC stage,VEGF expression                                                                              |
| Otsuka,2011        | Canada      | ND                                                                                                              |
| Wang,2011          | China       | Age,tumor size,smoking,lymph node status,stage,tumor classificaiton,pathological stage,STAT3,VEGF status        |
| Scala,2007         | Italy       | ND                                                                                                              |
| Oda,2007           | Japan       | Age,stage,grade,tumor size,YB-1,P-gp,p-Akt,LRP expression                                                       |
| He,2013            | China       | Age,sex,location,differentiation,Lauren classification,tumor size,TNM stage,distant metastasis                  |

| <b>First author, year</b> | <b>country</b> | <b>Adjustment for Covariates</b>                                                              |
|---------------------------|----------------|-----------------------------------------------------------------------------------------------|
| Zobair,2013               | China          | Age,clinic stage and treatment                                                                |
| Popple,2012               | UK             | FIGO stage,macroscopic residual disease,adjuvant therapy                                      |
| Pils,2007                 | Austria        | Histology,FIGO stage,grade,HER2,SDF-1                                                         |
| Jiang,2006                | China          | ND                                                                                            |
| Kaifi,2005                | Germany        | Lymph node metastasis,histologic grade,lymph node micrometastasis,bone marrow micrometastasis |
| Sasaki,2009               | Japan          | ND                                                                                            |
| Lu,2011                   | China          | ND                                                                                            |
| Lu,2014                   | China          | ND                                                                                            |
| Andre,2009                | France         | ND                                                                                            |
| Liu,2010                  | China          | ND                                                                                            |
| Chu,2010                  | US             | ND                                                                                            |
| Holm,2009                 | US             | ND                                                                                            |
| Blot,2008                 | France         | ND                                                                                            |
| Salvucci,2006             | Germany        | Age, T stage,BRE grade,number of positive lymph nodes, ER and PR status                       |
| Hiller,2011               | US             | ND                                                                                            |
| Chu,2011                  | US             | ND                                                                                            |
| Holm,2007                 | US             | ND                                                                                            |
| Hassan,2009               | Canada         | ND                                                                                            |
| Mizell,2009               | US             | ND                                                                                            |
| Kwak,2005                 | Korea          | ND                                                                                            |
| Reckamp,2009              | US             | ND                                                                                            |
| Spoo,2007                 | US             | Age,sex,WBC,LDH,cytogenetic abnormalities                                                     |
| Li,2014                   | China          | ND                                                                                            |
| An,2014                   | China          | Tumor size,T stage,N stage,M stage,TNM stage,Fuhrman grade,tumor necrosis,ECOG status         |

| <b>First author, year</b> | <b>country</b> | <b>Adjustment for Covariates</b>                                       |
|---------------------------|----------------|------------------------------------------------------------------------|
| Li,2013                   | France         | Age,sex,T stage,N stage,M stage,Fuhrman,ECOG status,necorsis           |
| Li,2011                   | China          | ND                                                                     |
| Zhang,2013,II             | China          | Age,sex,hemoglobin,WBC,platelet,karyotype and marrow blast             |
| D'Alterio,2010            | Italy          | Age,sex,clinic presentation,AJCC stage,Fuhrman grade,Lymphonodes,CXCR7 |
| Ahn,2013                  | US             | Age,sex,WHO classificaiton,NPM1,CEBPA,FLT3-ITD,FLT3-D835               |
| D'Alterio,2014            | Italy          | Age,sex,histology,TRG Mandard,T stage,CRM,N status,CXCL12              |
| Shiozaki,2013             | Japan          | Age,FIGO stage,histology                                               |
| Rombouts,2004             | netherlands    | ND                                                                     |
| Xiang,2009                | China          | ND                                                                     |
| Kim,2005                  | US             | ND                                                                     |
| Yao,2011                  | China          | ND                                                                     |
| Jung,2011                 | Korea          | ND                                                                     |
| Spano,2004                | France         | ND                                                                     |
| Marechal,2009             | Belgium        | ND                                                                     |
| Wagner,2009               | US             | ND                                                                     |
| Sekiya,2012               | Japan          | ND                                                                     |
| Bao,2013                  | China          | ND                                                                     |
| Liu,2014                  | China          | ND                                                                     |
| Koishi,2006               | Japan          | ND                                                                     |
| Gebauer,2011              | Germany        | ND                                                                     |
| Akashi,2008               | Japan          | ND                                                                     |
| Fanelli,2012              | Brazil         | ND                                                                     |
| Cabioglu,2007             | US             | ND                                                                     |
| Chen,2013,I               | China          | ND                                                                     |

| <b>First author, year</b> | <b>country</b> | <b>Adjustment for Covariates</b> |
|---------------------------|----------------|----------------------------------|
| Chen,2013,I               | China          | ND                               |
| Almofti,2004              | Japan          | ND                               |
| Lee,2009,II               | Korea          | ND                               |
| Zhang,2012                | China          | ND                               |
| Ying,2012                 | China          | ND                               |
| Lin,2011                  | China          | ND                               |
| Chen,2013,II              | China          | ND                               |
| Longo-Imedio,2005         | Spain          | ND                               |
| Segawa,2009               | Japan          | ND                               |
| Franco,2010               | Italy          | ND                               |
| Yu,2013                   | China          | ND                               |
| Saigusa,2010              | Japan          | ND                               |
| Kodama,2007               | Japan          | ND                               |
| Wang,2005                 | China          | ND                               |
